# Supplementary material for: Surface-independent CO2 and CO reduction on two-dimensional kagome metal KV3Sb5
Source: Royal Society of Chemistry journal article supplement (doi:10.1039/d3cp01983g), 2023-01-01
Supplement: d3cp01983g1.pdf [file d3cp01983g1.pdf]

## Supplementary Information

### Surface-independent CO<sub>2</sub> and CO Reduction on Two-dimensional Kagome Metal KV<sub>3</sub>Sb<sub>5</sub>

Xin-Wei Chen, Zheng-Zhe Lin\*, Meng-Rong Li

*School of Physics, Xidian University, Xi'an 710071, China*

\* Corresponding Author. E-mail address: [zzlin@xidian.edu.cn](mailto:zzlin@xidian.edu.cn)

## 1. The effect of various $+U$ values on the energy bands

In this section, the calculation results of the energy bands via PBE functional is compared with the results via PBE  $+U$ . **Fig. S1** shows the energy bands of  $\text{KV}_3\text{Sb}_5$  at the level of PBE and PBE  $+U$  (for  $U = 0, 0.5, 1, 1.56$  and  $3$  eV). We find that with increasing  $U$ , the energy bands are deviating from their origin structures and these Dirac points become unnoticeable. Such similar situation also exist in the energy calculation of  $\text{KV}_3\text{Sb}_5$  by Zhao et al [1]. They reported a dynamical mean-field theory (DMFT) study to produce energy bands without distortion. This phenomenon is common in metallic compounds with aggregated  $3d$  elements.

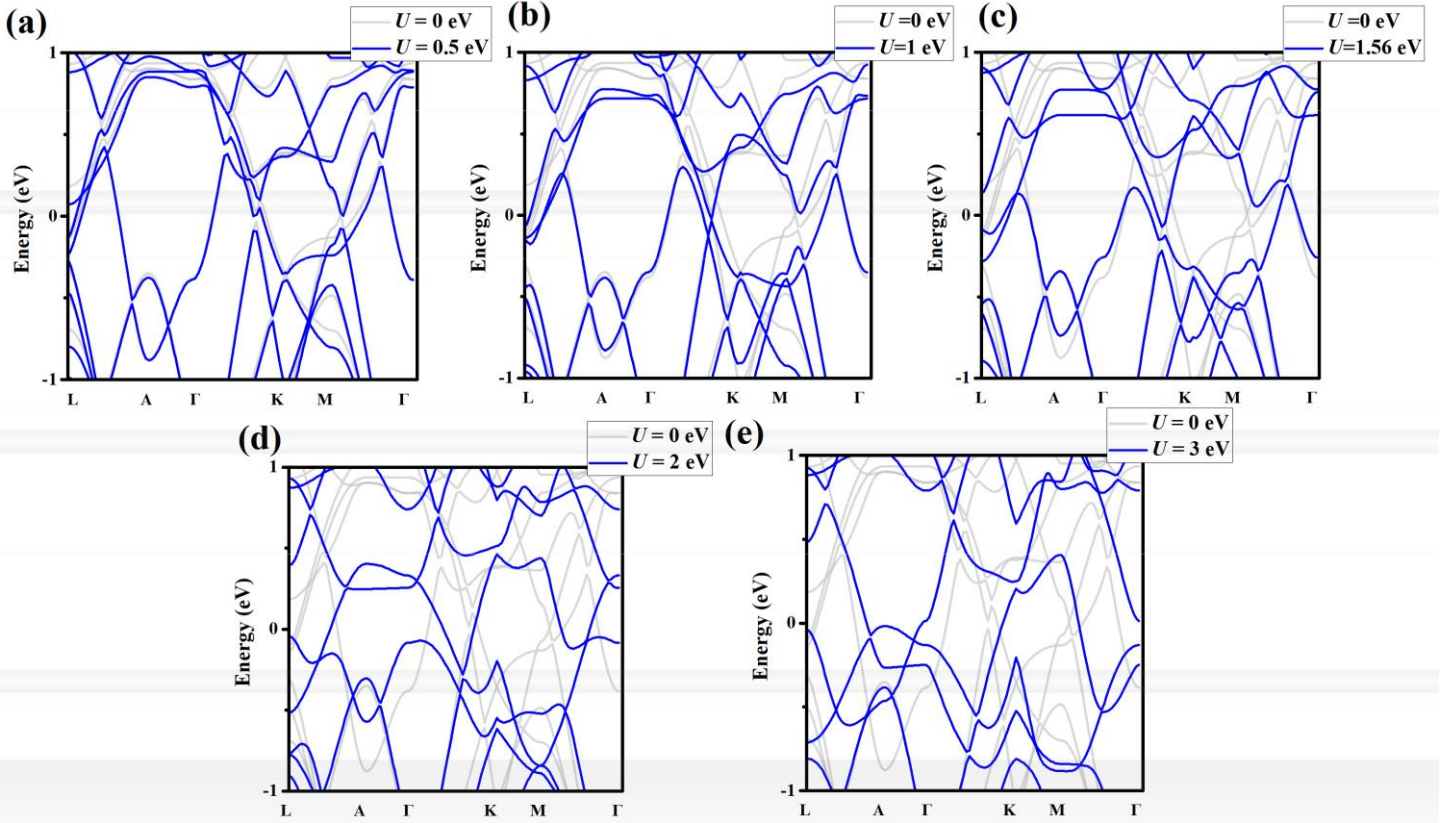

**Fig. S1** The energy bands of  $\text{KV}_3\text{Sb}_5$  at the level of PBE and PBE  $+U$ . The grey lines represent the energy bands calculated in PBE and the blue lines represent the energy bands calculated in PBE with various  $+U$ .

### References:

- [1] J. Zhao, W. Wu, Y. Wang, S. A. Yang, *Phys. Rev. B* **103**, L241117 (2021).

## 2. Determining the surface formation energy of KV<sub>3</sub>Sb<sub>5</sub>

In order to evaluate the stability of different surfaces, the chemical potential of the three atomic layers should be investigated. Their chemical potential are used to describe their interaction energy. To simplify the calculation, here we just consider the interaction between adjacent and second-adjacent layers. Hence, the equation of the free energy of KV<sub>3</sub>Sb<sub>5</sub> in a unit cell is defined as

$$E(\text{cell}) = \mu_{K_0} + 2\mu_{Sb2_0} + \mu_{VSb1_0} + 4I_{K-Sb2} + 4I_{Sb2-VSb1} + 4I_{K-VSb1} + 4I_{Sb2-Sb2} \quad (\text{S1})$$

where  $\mu_{K_0}$ ,  $\mu_{Sb2_0}$  and  $\mu_{VSb1_0}$  represent the chemical potential of K, Sb2 and VSb1 layers without interaction, respectively. The term  $2I_{K-Sb2}$  represents the interaction energy between one K layer and one adjacent Sb2 layer, and so on. We supposed that the interaction energy is divided equally on the chemical potential of each layer. Hence, a K layer can interact with two adjacent Sb2 layer and be allocated chemical potential of  $2I_{K-Sb2}$ . The total chemical potential of K layer in bulk KV<sub>3</sub>Sb<sub>5</sub> reads

$$\mu_K = \mu_{K_0} + 2I_{K-Sb2} + 2I_{K-VSb1} \quad (\text{S2})$$

Similarly, the chemical potential of Sb2 and VSb1 layers are

$$\mu_{Sb2} = \mu_{Sb2_0} + I_{K-Sb2} + I_{Sb2-VSb1} + 2I_{Sb2-Sb2} \quad (\text{S3})$$

and

$$\mu_{VSb1} = \mu_{VSb1_0} + 2I_{Sb2-VSb1} + 2I_{K-VSb1} \quad (\text{S4})$$

The free energy of KV<sub>3</sub>Sb<sub>5</sub> unit cell without one K layer reads

$$E(\text{without K}) = 2\mu_{Sb2_0} + \mu_{VSb1_0} + 4I_{Sb2-VSb1} + 4I_{Sb2-Sb2} \quad (\text{S5})$$

Based on an optimized unit cell, we get rid of one or two layers in it and then perform static calculation. The formulas are listed in the following. The free energy of KV<sub>3</sub>Sb<sub>5</sub> unit cell without one Sb2 layer reads

$$E(\text{without Sb2}) = \mu_{K_0} + \mu_{VSb1_0} + 2I_{K-Sb2} + 2I_{Sb2-VSb1} + 4I_{K-VSb1} \quad (\text{S6})$$

The free energy of KV<sub>3</sub>Sb<sub>5</sub> unit cell without one VSb1 layer reads

$$E(\text{without VSb1}) = \mu_{K_0} + 2\mu_{Sb_{20}} + 4I_{K-Sb_2} + 4I_{Sb_2-Sb_2} \quad (S7)$$

The free energy of  $KV_3Sb_5$  unit cell without one VSb1 and one K layer reads

$$E(\text{without K and VSb1}) = 2\mu_{\text{Sb}20} + 4I_{\text{Sb}2-\text{Sb}2} \quad (\text{S8})$$

The free energy of  $\text{KV}_3\text{Sb}_5$  unit cell without one Sb2 and one K layer reads

$$E(\text{without K and Sb2}) = \mu_{\text{Sb}20} + \mu_{\text{VSb}10} + 2I_{\text{Sb}2-\text{VSb}1} \quad (\text{S9})$$

The free energy of  $\text{KV}_3\text{Sb}_5$  unit cell without one Sb2 and one VSb1 layer reads

$$E(\text{without VSb1 and Sb2}) = \mu_{\text{K}_0} + \mu_{\text{Sb}20} + \frac{2}{I} I_{\text{K}-\text{Sb}2} \quad (\text{S10})$$

The linear relation above can be summarized into the following matrix formula,

$$\begin{pmatrix} E(\text{cell}) \\ E(\text{without K}) \\ E(\text{without Sb2}) \\ E(\text{without VSb1}) \\ E(\text{without K and VSb1}) \\ E(\text{without K and Sb2}) \\ E(\text{without Sb2 and VSb1}) \end{pmatrix} = \begin{pmatrix} 1 & 2 & 1 & 4 & 4 & 4 & 4 \\ 0 & 2 & 1 & 0 & 4 & 0 & 4 \\ 1 & 1 & 1 & 2 & 2 & 4 & 0 \\ 1 & 2 & 0 & 4 & 0 & 0 & 4 \\ 0 & 2 & 0 & 0 & 0 & 0 & 4 \\ 0 & 1 & 1 & 0 & 2 & 0 & 0 \\ 1 & 1 & 0 & 2 & 0 & 0 & 0 \end{pmatrix} \begin{pmatrix} \mu_{\text{K}^0} \\ \mu_{\text{Sb}2_0} \\ \mu_{\text{VSb}1_0} \\ I_{\text{K}-\text{Sb}2} \\ I_{\text{Sb}2-\text{VSb}1} \\ I_{\text{K}-\text{VSb}1} \\ I_{\text{Sb}2-\text{Sb}2} \end{pmatrix}$$

According to the results of static calculation, seven energy values on the left are  $E(\text{cell}) = -45.651$  eV,  $E(\text{without K}) = -43.143$  eV,  $E(\text{without Sb2}) = -34.584$  eV,  $E(\text{without VSb1}) = -16.424$ eV,  $E(\text{without K and VSb1}) = -13.2517$  eV,  $E(\text{without K and Sb2}) = -32.293$  eV and  $E(\text{without Sb2 and VSb1}) = -9.024$ eV. Calculated by inverting the matrix,  $\mu_{\text{K}_0}$ ,  $\mu_{\text{Sb}2_0}$ ,  $\mu_{\text{VSb}1_0}$ ,  $I_{\text{K}-\text{Sb}2}$ ,  $I_{\text{Sb}2-\text{VSb}1}$ ,  $I_{\text{K}-\text{VSb}1}$  and  $I_{\text{Sb}2-\text{Sb}2}$  are  $-2.74$  eV,  $-6.07$  eV,  $-22.56$  eV,  $-0.11$  eV,  $-1.83$  eV,  $0.16$  eV and  $-0.28$ eV, respectively. Using **Eq. (S2)**, **(S3)** and **(S4)**, the chemical potentials  $\mu_{\text{K}}$ ,  $\mu_{\text{Sb}2_0}$  and  $\mu_{\text{VSb}1_0}$  are  $-2.62$  eV,  $-8.57$  eV and  $-25.89$  eV, respectively.

### 3. Active sites on the surfaces

To understand the surface activity of  $\text{KV}_3\text{Sb}_5$ , here we analyze the formation energies of  $\text{H}^*$  and  $\text{O}^*$  absorbed on different sites A, B, C and D for the three surfaces (for the definition of surfaces and sites, see **Fig. 3(a)**), namely perfect surface Sb2-VSb1, surface Sb2-VSb1 with Sb vacancy, and perfect surface VSb1. Here, A is on the top of an Sb atom in the VSb1 layer. B is on the top of an Sb atom in Sb2 layer. the V triangle in the VSb1 layer. D is on the top of a V atom in the VSb1 layer. For surface Sb2-VSb1, A and B sites are considered. When with Sb vacancy, the exposed C site in the second layer is then considered too. For surface VSb1, A, C and D sites are considered. The equation of formation energy can be written as

$$\Delta G(\text{H}^*) = G(\text{H}^*) - G(\text{slab}) - \frac{1}{2}G(\text{H}_2) + eU$$

and

$$\Delta G(\text{O}^*) = G(\text{O}^*) - G(\text{slab}) + G(\text{H}_2) - G(\text{H}_2\text{O}) - 2eU$$

According to their formation energy (listed in **Table S1**), we can find that both for  $\text{H}^*$  and  $\text{O}^*$  on the perfect Sb2-VSb1 surface, their formation energies for A site are lower than for B site. But with a vacancy of Sb atom on the surface, the C site is exposed and  $\text{O}^*$  as well as  $\text{H}^*$  is more easily absorbed here. For the completely exposed VSb1 surface, the hollow site C is better than other sites.

**Table S1** The Formation energy of  $\text{H}^*$  and  $\text{O}^*$  absorbed on different sites.

| Surfaces                    | Sb2-VSb1 |      | Sb2-VSb1 with vacancy |      |       | VSb1 |       |       |
|-----------------------------|----------|------|-----------------------|------|-------|------|-------|-------|
| Sites                       | A        | B    | A                     | B    | C     | A    | C     | D     |
| $\Delta G(\text{H}^*)$ (eV) | 0.55     | 1.42 | 0.67                  | 1.25 | -0.62 | 2.58 | -0.78 | 0.60  |
| $\Delta G(\text{O}^*)$ (eV) | 1.34     | 1.76 | 1.24                  | 1.80 | -1.53 | 2.01 | -1.81 | -0.26 |

In conclusion, the most active sites on these surfaces are A for perfect surface Sb2-VSb1, C for surface VSb1 and surface Sb2-VSb1 with Sb vacancy.

#### 4. The main products of CO<sub>2</sub>RR and CORR

In this section, we introduce the main product and reaction in CO<sub>2</sub>RR and CORR. Considering the market mass and economic viability, CO and HCOOH are the main product through COOH path and HCOO path respectively. The product CO can act as a substrate to undergo the process of CO reduction reaction. For the multicarbon products, they are difficult to obtain in CO<sub>2</sub>RR but CORR provide a better route for the formation of multicarbon product [1]. **Table S2** shows the product and reaction of CO<sub>2</sub>RR. Except for CO and HCOOH, CO<sub>2</sub>RR share the same products with CORR.

**Table S2** The reactions and products of CO<sub>2</sub>RR.

| Product                            | Reaction                                                                                       |
|------------------------------------|------------------------------------------------------------------------------------------------|
| HCOOH                              | $\text{CO}_2 + \text{H}_2 \rightarrow \text{HCOOH}$                                            |
| CO                                 | $\text{CO}_2 + \text{H}_2 \rightarrow \text{CO} + \text{H}_2\text{O}$                          |
| CH <sub>4</sub>                    | $\text{CO}_2 + 4\text{H}_2 \rightarrow \text{CH}_4 + 2\text{H}_2\text{O}$                      |
| HCHO                               | $\text{CO}_2 + 2\text{H}_2 \rightarrow \text{HCHO} + \text{H}_2\text{O}$                       |
| C <sub>2</sub> H <sub>4</sub>      | $2\text{CO}_2 + 6\text{H}_2 \rightarrow \text{C}_2\text{H}_4 + 4\text{H}_2\text{O}$            |
| CH <sub>3</sub> CH <sub>2</sub> OH | $2\text{CO}_2 + 6\text{H}_2 \rightarrow \text{CH}_3\text{CH}_2\text{OH} + 3\text{H}_2\text{O}$ |
| C <sub>2</sub> H <sub>6</sub>      | $2\text{CO}_2 + 7\text{H}_2 \rightarrow \text{C}_2\text{H}_6 + 4\text{H}_2\text{O}$            |
| C <sub>3</sub> H <sub>7</sub> OH   | $3\text{CO}_2 + 9\text{H}_2 \rightarrow \text{C}_3\text{H}_7\text{OH} + 5\text{H}_2\text{O}$   |
| CH <sub>3</sub> OH                 | $\text{CO}_2 + 3\text{H}_2 \rightarrow \text{CH}_3\text{OH} + \text{H}_2\text{O}$              |

#### References:

[1] Y. Meng, S. B. Cheng, Z. Wu, *Appl. Surf. Sci.* **597**, 153761 (2022).

## 5. CO<sub>2</sub>RR and CORR on pristine surfaces K and VSb1

Although the surface K cannot exist in aqueous electrolyte, we still roughly investigate the catalytic performance without considering its surface states. Simultaneously, the pristine surface VSb1 is also discussed as a control. Their intermediates and free energies are shown in **Fig. S2 (a) - (d)**. From the data, we can easily find that compared with the surface K, the surface VSb1 has a stronger adsorption capacity for the intermediates in CO<sub>2</sub>RR and CORR because the free energy for the intermediates absorbed on the surface gradually decreases as the reduction reaction proceeds. Their free energies are lower than those of the same intermediates on the K surface. For the intermediate HCOO\* on K surface, the two O atoms are on the bridge sites of K atoms. On the VSb1 surface, only one atom is on the hollow site of the V triangle. Such the bridge connection brings the absorbed HCOO\* lower energy. As a rate-determining reaction step  $\text{HCOO}^* + \text{H}^+ + \text{e}^- \rightarrow \text{HCOOH}^*$ , the free energy rises sharply by 1.77 eV. Such a large onset potential used in CO<sub>2</sub>RR is just a waste of electric energy. We also find the two O atoms in HCOOH\* move closer to K atom. The change of their position might contribute to the rise in free energy. For the H<sub>2</sub>COOH\*, the O atoms return to the bridge site and its free energy decreases. The next step, the C-OH bond in HCOOH is cut by H and H<sub>2</sub>CO\* forms, which also appears in the CORR.

For the CORR on the K surface, the rate-determining step is  $\text{HCO}^* + \text{H}^+ + \text{e}^- \rightarrow \text{H}_2\text{CO}^*$  with an increase in free energy by 0.31 eV. The following steps are energy-decreasing. The desorption of H<sub>2</sub>CO\* requires 0.38 eV. Hence, it is more likely to be reduced to H<sub>3</sub>CO\* and finally to CH<sub>4</sub> + H<sub>2</sub>O(aq). The O\* cannot exist when  $U < 0$  V. But for CORR on VSb1 surface, the final product is also CH<sub>4</sub> but the O\* remains because of its strong connection with the V atoms in the site. This is the reason why we had to consider the states of VSb1 surface.



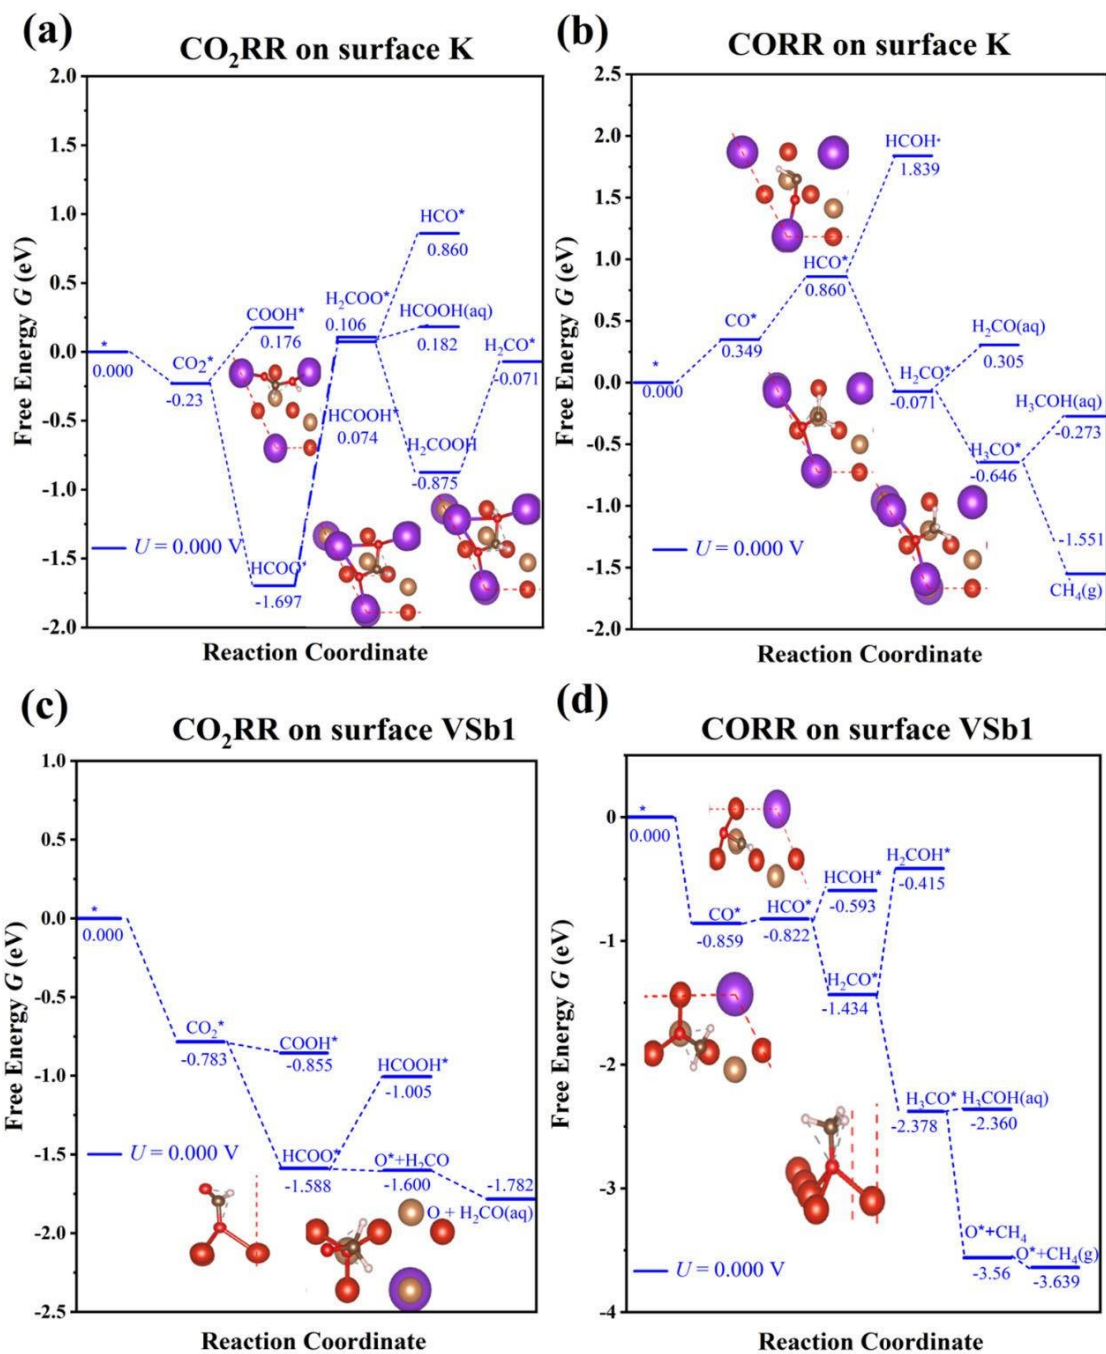

**Fig. S2** The free energies of reaction intermediates on the pristine K surface for CO<sub>2</sub>RR and CORR as well as on the pristine VSb1 surface for CO<sub>2</sub>RR and CORR.

## 6. The surface formation energy

To verify the results of  $\text{KV}_3\text{Sb}_5$  surface formation energy, we compare the data with the surface formation energies of common metals. The experimentally measured surface energies of transition metals are in the range of  $1\sim 3 \text{ J/m}^2$ , while the surface energies of most main-group metals are below  $1 \text{ J/m}^2$  [1]. The formation energies of  $\text{KV}_3\text{Sb}_5$  surfaces are within this range.

As a comparison, we calculate the surface formation energy of Cu (111) surface. The Cu lattice is face-centered cubic. The primitive cell of Cu is shown in **Fig. S3 (a)**. The six-layer slab model shown in **Fig. S3 (b)** has exposed Cu (111) surfaces at both ends. The calculation is performed at the level of PBE, with a kinetic energy cut-off of 500 eV. The Brillouin zone is sampled with a k-spacing of  $0.04 \text{ \AA}^{-1}$ . The geometries of bulk and slab models are relaxed. The surface formation energy of the Cu (111) surface is determined to be  $7.58 \times 10^{-2} \text{ eV/\AA}^2$ , which is equivalent to  $1.22 \text{ J/m}^2$  in SI unit. This result is close to the calculation in Ref. 2.

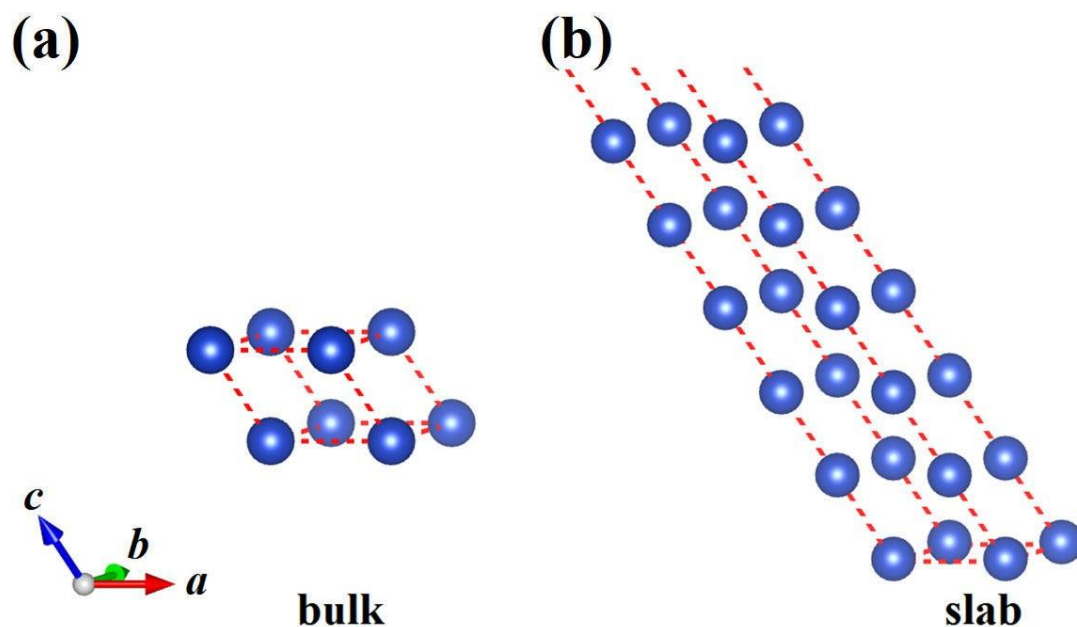

**Fig. S3** The models of bulk Cu and a slab of the Cu (111) surface.

It should be noted that the surface formation energy is positive, which means that creating a surface from bulk materials is endothermic. The (111) surface is a commonly

exposed surface of Cu grains. For  $KV_3Sb_5$ , the calculated formation energies of the K and Sb2-VSb1 surfaces are lower than that of the Cu (111) surface. This indicates that the K and Sb2-VSb1 surfaces should be more stable. The Sb2-K and VSb1 surfaces are less stable, as indicated by their higher formation energies.

**References:**

- [1] L. Vitos, A. V. Ruban, H. L. Skriver, J. Kollár, *Surf. Sci.* **411**, 186-202 (1998).
- [2] Y. Han, K. C. Lai, A. Lii-Rosales, M. C. Tringides, J. W. Evans, P. A. Thiel, *Surf. Sci.* **685**, 48-58 (2019).

## 7. Solvation effect and the explicit solvent model

Chemical reactions at the interface between solid and liquid are always affected by the solvation effect. In theoretical simulations, the solvation effect can be simplified using the implicit solvent model, which primarily considers the effect of solvent molecules as dielectric. Although this method reduces the quantity of computation, its reliability should be verified. Indeed, the solvation effect is essential for the reactions. In an aqueous environment, hydrogen bonding between water molecules and the reaction intermediate has a significant effect in certain cases. This effect is not accounted for in the implicit solvent model. The explicit model should include at least one or two solvent layers, preferably containing more than three layers. Moreover, for a certain reaction intermediate, many different configurations of solvent molecules should be considered in order to find the lowest-energy configuration. This results in a large computation quantity.

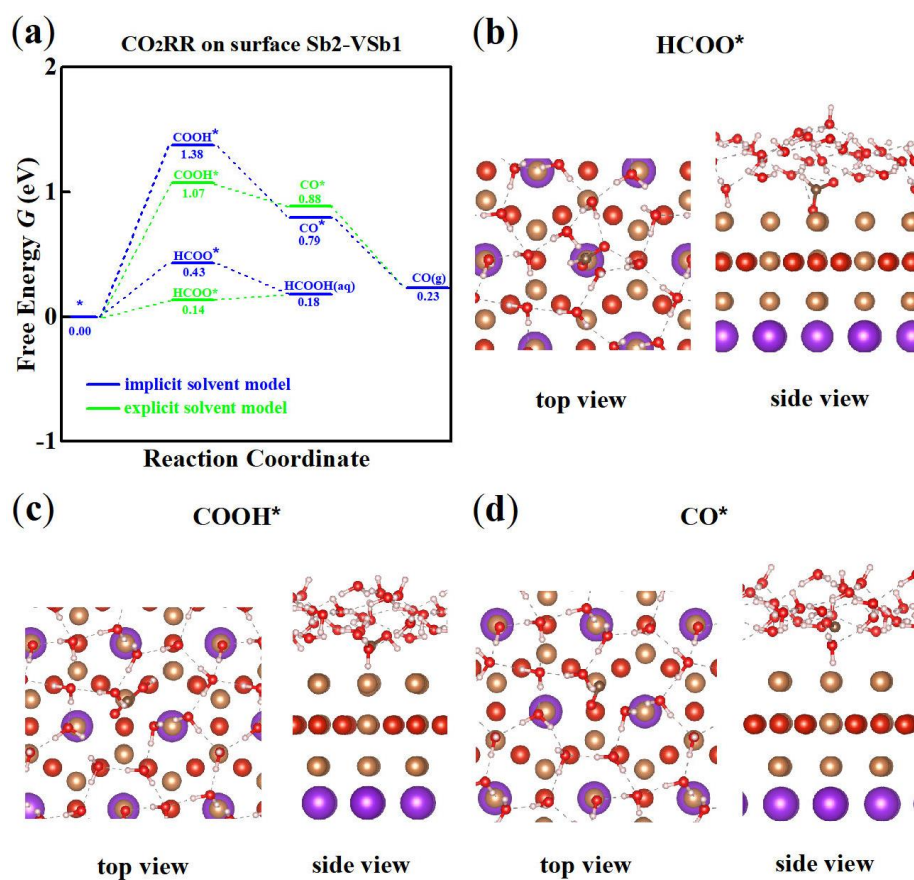

**Fig. S4** (a) The reaction free energy of CO<sub>2</sub>RR on surface Sb<sub>2</sub>-VSb<sub>1</sub>, calculated using the explicit and implicit solvent model. The structure of (b) HCOO\*, (c) COOH\* and (d) CO\* in the explicit solvent model.

The slab models in our study contain more than one hundred atoms. It is difficult to calculate every reaction intermediate using the explicit model. In this section, some typical reaction processes are dealt with the explicit water model, and compared with the results of implicit model. The calculation using the explicit water model employs two layers of water molecules. **Fig. S4 (a)** shows the free energy diagram of CO<sub>2</sub>RR on the Sb<sub>2</sub>-VSb<sub>1</sub> surface. The data from the explicit and implicit models are both shown for comparison. The free energies of COOH\* and HCOO\* given by the explicit model are correspondingly lower than those given by the implicit model. In **Fig. S4 (b)** and **(c)**, we can see the hydrogen bonds between water molecule and the COOH\* and HCOO\*. This is the reason for the stabilization of COOH\* and HCOO\*. In contrast, the free energy of CO\* calculated by the explicit model is higher than that by the implicit model due to the hydrophobicity of CO\*.

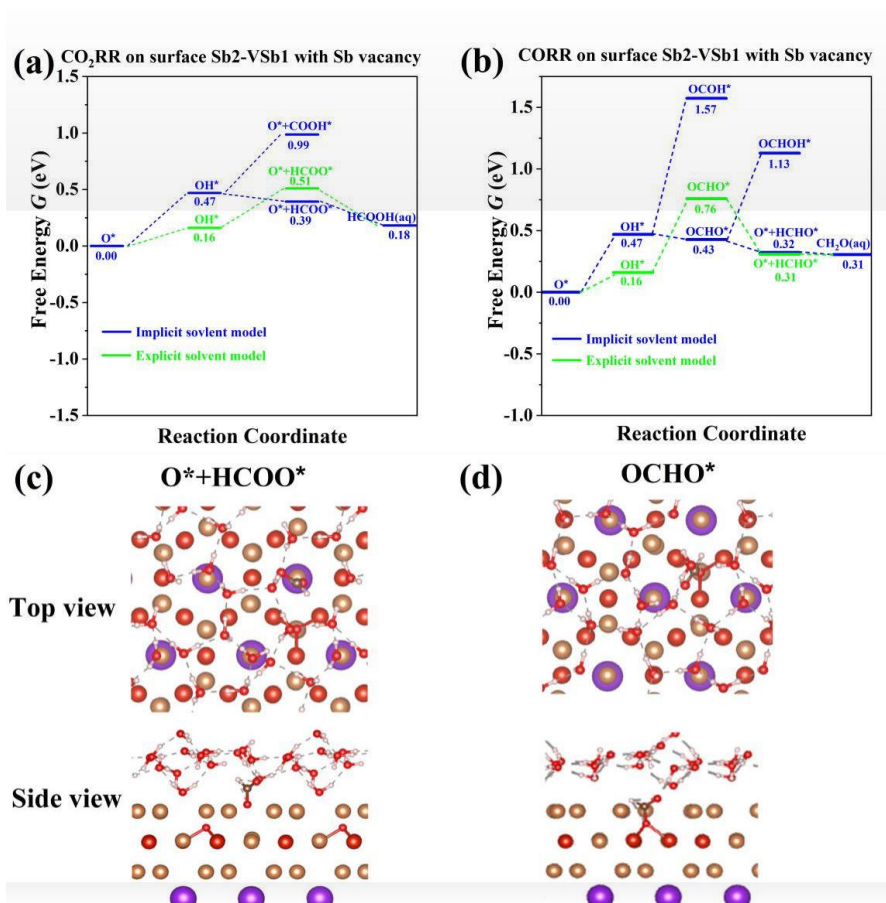

**Fig. S5** The reaction free energy of **(a)** CO<sub>2</sub>RR and **(b)** CORR on surface Sb<sub>2</sub>-VSb<sub>1</sub> with Sb vacancy, calculated using the explicit and implicit solvent model. The structure of **(c)** O\*+HCOO\* and **(d)** OCHO\* in the explicit solvent model.

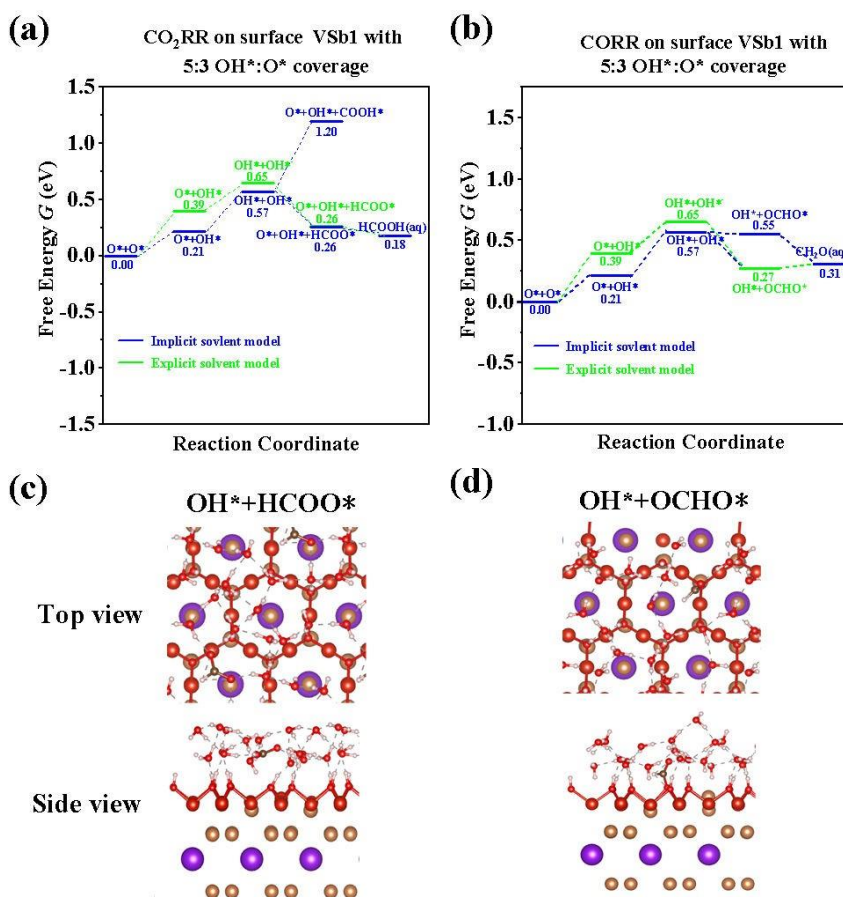

**Fig. S6** The reaction free energy of (a) CO<sub>2</sub>RR and (b) CORR on the surface VSb1 with a 5:3 OH\*:O\* coverage, calculated using the explicit and implicit solvent model. The structure of (c) OH\*+HCOO\* and (d) OH\*+OCHO\* in the explicit solvent model.

For CO<sub>2</sub>RR and CORR on the Sb2-VSb1 surface with an Sb vacancy, we can observe the effect of hydrogen bonding on O\*. **Fig. S5 (a)** and **(b)** show the free energy diagrams of CO<sub>2</sub>RR and CORR, respectively, on the Sb2-VSb1 surface with an Sb vacancy. For the initial state O\* in the explicit water model, we observe a stabilization effect by the hydrogen bonding between O\* and H<sub>2</sub>O. For OH\*, the free energy is lower compared to the implicit model due to the hydrogen bonding between the H of OH\* and the O of H<sub>2</sub>O molecule. In CO<sub>2</sub>RR, the free energy of O\*+HCOO\* in the explicit model is larger than that in the implicit model. In **Fig. S5 (c)**, we can see a hydrogen bond between the O of HCOO\* and the H of H<sub>2</sub>O molecule. But the stabilization effect of hydrogen bonding for HCOO\* is weaker than that of O\*. So, the free energy of O\*+HCOO\* in the explicit water model is higher than that in the implicit model. For CORR, similar effect is also found for OCHO\*. In **Fig. S5 (d)**, we can see a hydrogen

bond between OCHO\* and H<sub>2</sub>O. In **Fig. S5 (b)**, the free energy of OCHO\* in the explicit model is larger than that in the implicit model.

**Fig. S6 (a)** and **(b)** show the free energy diagrams of CO<sub>2</sub>RR and CORR, respectively, on the VSb1 surface with a 5:3 OH\*:O\* coverage. The explicit model shows larger free energy change for the O\*→OH\* steps. **Fig. S6 (c)** shows the structure of HCOO\* in CO<sub>2</sub>RR calculated by the explicit model. The free energy of HCOO\* calculated by the explicit model is close to that of the implicit model. **Fig. S6 (d)** shows the structure of OCHO\* in CORR calculated by the explicit model. The free energy of HCOO\* calculated by the explicit model is much lower than that of the implicit model. We can also see the effect of hydrogen bonds.

In summary, in the presence of hydrogen bonding, we cannot expect the explicit and implicit models to be exactly the same. Qualitatively, the trends of free energy given by the explicit and implicit models are consistent. The HCOO\* reaction path is actually thermodynamically favorable. To save computation quantity, we use the implicit model in the whole study.



## 8. The H-shuttle mechanism

In the step of  $O^* + H^+ + e \rightarrow OH^*$ , we observe an indirect process of H transfer, known as the H-shuttle mechanism. For the initial state, if the  $H_3O^+$  is placed near  $O^*$ , it will transform into  $OH^*$  in the geometry relaxation. In the stable configuration, the  $H_3O^+$  should be located farther. The  $H_3O^+$  is located at a position that is a distance away from the  $O^*$  (separated by one or two  $H_2O$ ). In the reaction path of  $O^* + H^+ + e \rightarrow OH^*$ , the H is transferred from one  $H_2O$  to another, and then to the destination. **Fig. S7** and **S8** show two examples.

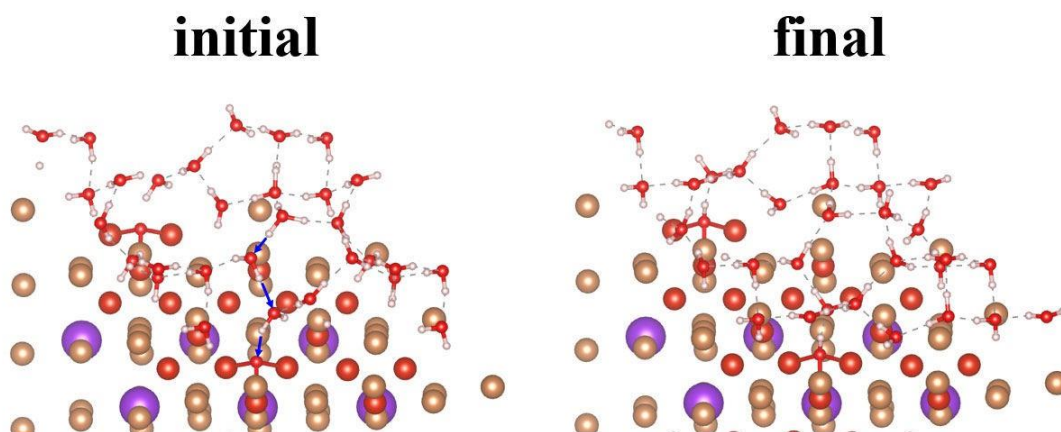

**Fig. S7** The H-shuttle process of the  $O^* \rightarrow OH^*$  step on the surface Sb2-VSb1 with an Sb vacancy.

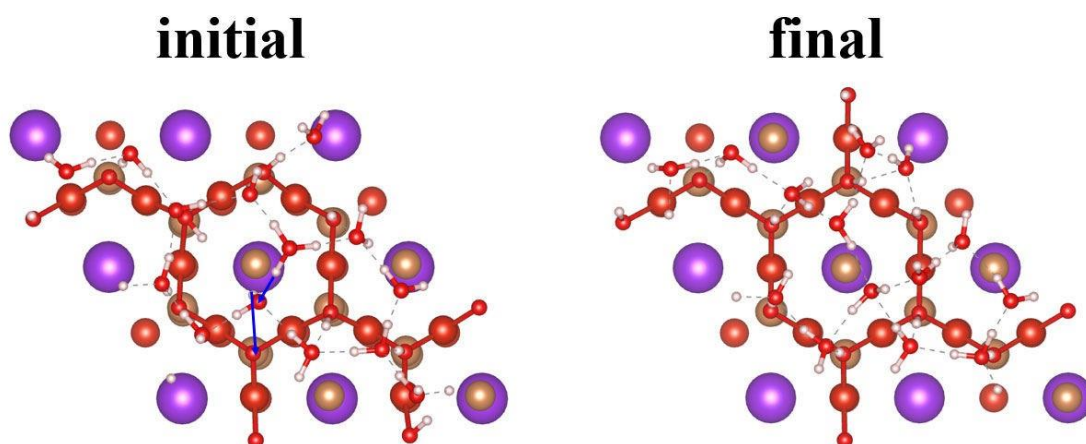

**Fig. S8** The H-shuttle process of the  $O^* \rightarrow OH^*$  step on the surface VSb1 with a 5:3  $OH^*:O^*$  coverage.
